# Supplementary material for: Correlation between Physical Performance and Tensiomyographic and Myotonometric Parameters in Older Adults
Source: MDPI journal article supplement (doi:10.3390/healthcare11152169), 2023-07-31

# Supplementary Material S1

5XSST, five-times sit to stand test; Dm, maximal radial muscle displacement; RF, rectus femoris; St, stiffness; SPPB, short physical performance battery; VL, vastus lateralis.

Supplementary Material S1a: Correlation diagram SPPB and Dm-RF

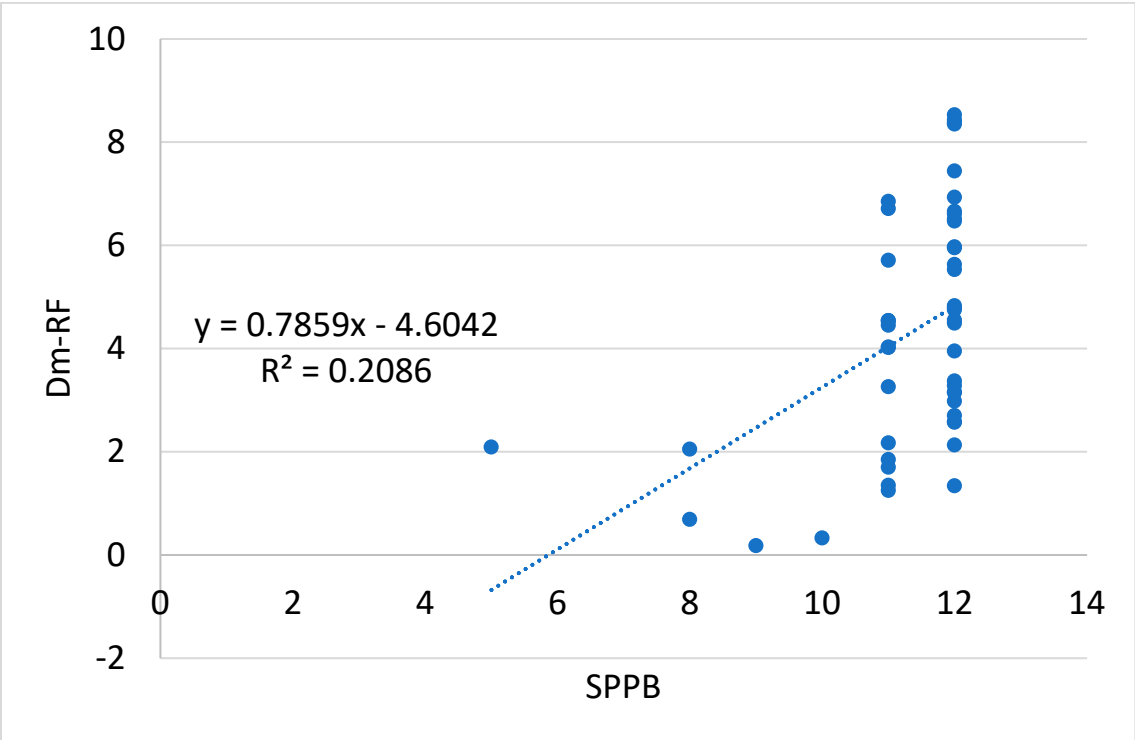

Supplementary Material S1b: Correlation diagram SPPB and Dm-VL

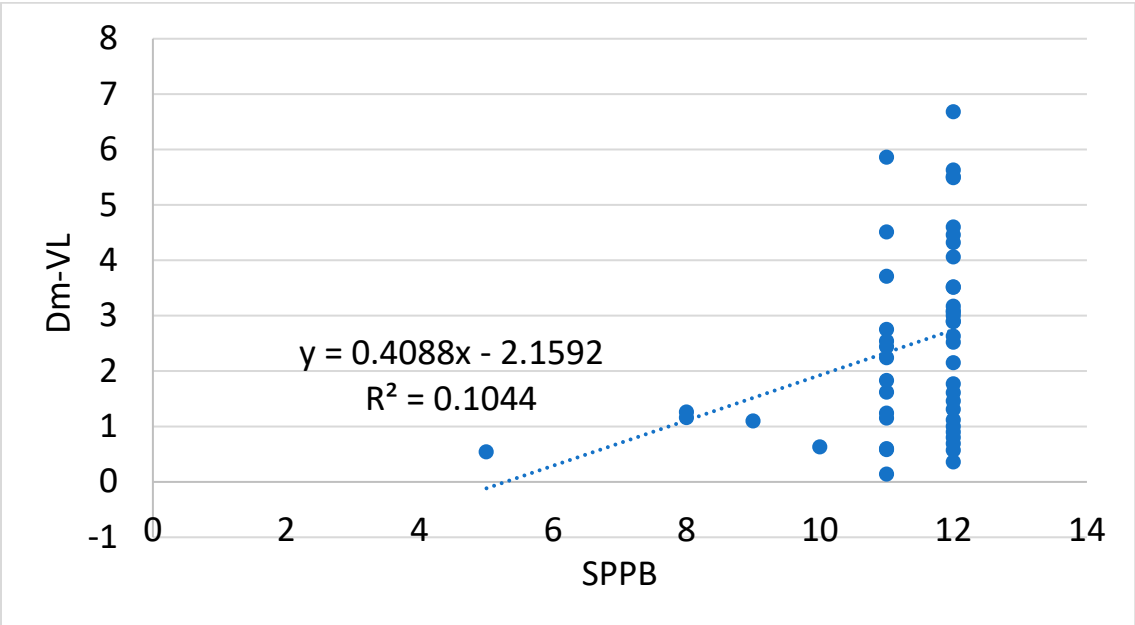

**Supplementary Material S1c:** Correlation diagram 5XSST and Dm-RF

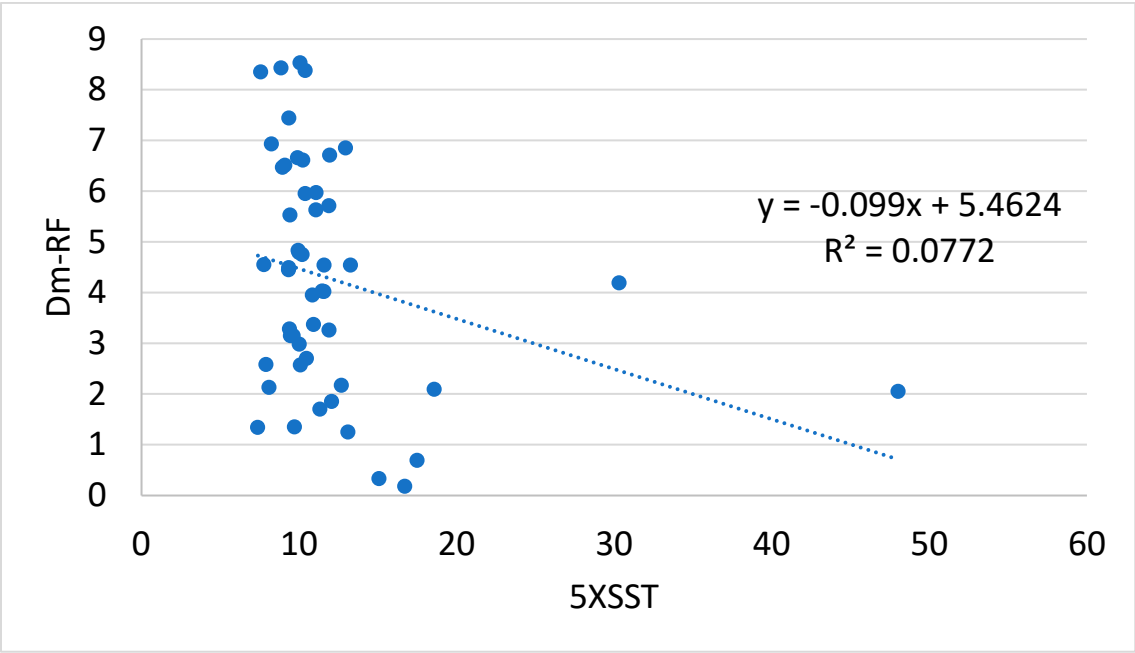

**Supplementary Material S1e:** Correlation diagram 5XSST and St-VL

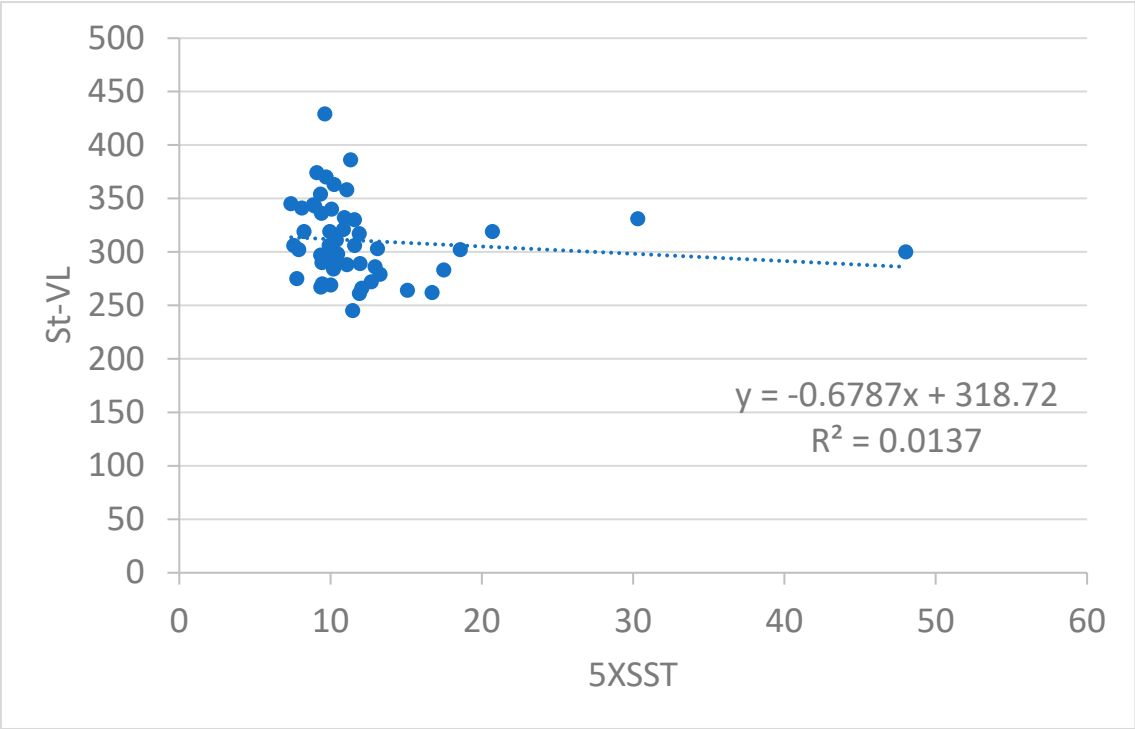

Supplement: s1 [file s1]
